# Supplementary material for: Notes on Numerical Dynamic Programming in Economic Applications
Source: Royal Society of Chemistry journal article supplement (doi:10.1039/c9ra10481j), 2006-01-01
Supplement: c9ra10481j1.pdf [file c9ra10481j1.pdf]

## Supporting Information

### **Electronic Structure of iron dinitrogen complex [(TPB)FeN<sub>2</sub>]<sup>2-/1/0</sup>: correlation to Mössbauer parameters**

\*Nidhi Vyas<sup>1</sup>, Aditya Kumar<sup>2</sup>, Animesh K. Ojha<sup>2</sup>, Abhinav Grover<sup>1</sup>

<sup>1</sup>School of Biotechnology, Jawaharlal Nehru University, New Delhi-110067

<sup>3</sup>Department of Physics, Motilal Nehru National Institute of Technology, Allahabad-211004

**Table S1:** Optimized parameters and energies (a.u.) of all complexes  $[(\text{TPB})\text{FeN}_2]^{2-/-1/0}$  at B3LYP level of theory using LANL2DZ/6-31G(d) basis set (distances in Å and angles in degree). Experimental values are in small bracket & blue colour.

| Species          |       | Fe-B                    | Fe-N1                   | Fe-P              | N1-N2                   | $\angle\text{P-Fe-P}$ | $\angle\text{B-Fe-N1}$ | $\angle\text{Fe-N1-N2}$ | Energies (a.u.) |
|------------------|-------|-------------------------|-------------------------|-------------------|-------------------------|-----------------------|------------------------|-------------------------|-----------------|
| Fe <sup>2-</sup> | S=0   | 2.369<br><b>(2.34)</b>  | 1.779<br><b>(1.772)</b> | 2.137,2.137,2.137 | 1.145<br><b>(1.16)</b>  | 116.3,116.2,116.2     | 179.9                  | 179.9                   | -3355.014752    |
| Fe <sup>1-</sup> | S=1/2 | 2.345<br><b>(2.293)</b> | 1.807<br><b>(1.776)</b> | 2.254,2.224,2.242 | 1.136<br><b>(1.149)</b> | 106.8,107.1,134.0     | 178.4                  | 179.3<br><b>(179.5)</b> | -3354.976925    |
| Fe <sup>0</sup>  | S=1   | 2.28                    | 1.973                   | 2.404,2.404,2.404 | 1.121                   | 117.7,117.7,117.7     | 179.9                  | 179.9                   | -3354.8936      |
|                  | S=0   | 2.237                   | 1.826                   | 2.194,2.254,2.265 | 1.127                   | 157.1,96.9,101.2      | 173.7                  | 176.3                   | -3354.8752      |

**Table S2:** Nature of Fe-N, Fe→B bonds, APT charges and HOMO-LUMO gap (eV) in complexes  $[(\text{TPB})\text{FeN}_2]^{2-/-1/0}$ .

| Complex          | Bond | Orbitals                                                  | % Contribution          | APT Charges |      |            |           | HOMO-LUMO gap(eV) | $\nu(\text{N} \equiv \text{N})$<br>cm <sup>-1</sup> |
|------------------|------|-----------------------------------------------------------|-------------------------|-------------|------|------------|-----------|-------------------|-----------------------------------------------------|
|                  |      |                                                           |                         | Fe          | B    | N $\alpha$ | N $\beta$ |                   |                                                     |
| Fe <sup>2-</sup> | Fe-N | $sp^{2.21}d^{2.47}(\text{Fe})$<br>$sp^{0.70}(\text{N})$   | 21.55%(Fe), 78.45% (N)  | -2.180      | 0.18 | 1.31       | -1.12     | 2.76              | 2079                                                |
|                  | Fe-B | $sp^{68.64}d^{54.37}(\text{Fe})$<br>$sp^{3.29}(\text{B})$ | 53.79% (Fe), 46.21% (B) |             |      |            |           |                   |                                                     |
| Fe <sup>1-</sup> | Fe-N | $sp^{4.07}d^{2.77}(\text{Fe})$<br>$sp^{0.72}(\text{N})$   | 18.65% (Fe), 81.35% (N) | -1.438      | 0.29 | 1.20       | -1.02     | 3.59              | 2142                                                |
|                  | Fe-B | $sp^{99.99}d^{99.99}(\text{Fe})$<br>$sp^{4.18}(\text{B})$ | 67.70% (Fe), 32.30% (B) |             |      |            |           |                   |                                                     |
| Fe <sup>0</sup>  | Fe-N | $sp^{2.73}d^{0.11}(\text{Fe})$<br>$sp^{0.66}(\text{N})$   | 11.13% (Fe), 88.87% (N) | -0.44       | 0.41 | 0.85       | -0.74     | 4.43              | 2246                                                |
|                  | Fe-B | $sp^{0.45}d^{0.12}(\text{Fe})$<br>$sp^{1.81}(\text{B})$   | 55.93% (Fe), 44.07% (B) |             |      |            |           |                   |                                                     |

**Table S3:** Topological parameters corresponds to the Fe-B and Fe-N bonds

| Species               | BCP   | $\rho$ (e $\text{\AA}^{-3}$ ) | $\nabla^2 \rho$ (e $\text{\AA}^{-3}$ ) | G(r)<br>(hartree<br>$\text{\AA}^{-3}$ ) | V(r)<br>(hartree<br>$\text{\AA}^{-3}$ ) | H(r)<br>(hartree<br>$\text{\AA}^{-3}$ ) |
|-----------------------|-------|-------------------------------|----------------------------------------|-----------------------------------------|-----------------------------------------|-----------------------------------------|
| Fe <sup>2+</sup> -AIM | Fe- B | 0.059                         | 0.033                                  | 0.022                                   | -0.036                                  | -0.014                                  |
|                       | Fe- N | 0.133                         | 0.833                                  | 0.262                                   | -0.315                                  | -0.053                                  |
| Fe <sup>1+</sup> -AIM | Fe- B | 0.061                         | 0.024                                  | 0.021                                   | -0.035                                  | -0.014                                  |
|                       | Fe- N | 0.124                         | 0.787                                  | 0.244                                   | -0.291                                  | -0.047                                  |
| Fe <sup>0</sup> -AIM  | Fe- B | 0.063                         | 0.020                                  | 0.021                                   | -0.037                                  | -0.016                                  |
|                       | Fe- N | 0.081                         | 0.546                                  | 0.148                                   | -0.160                                  | -0.012                                  |



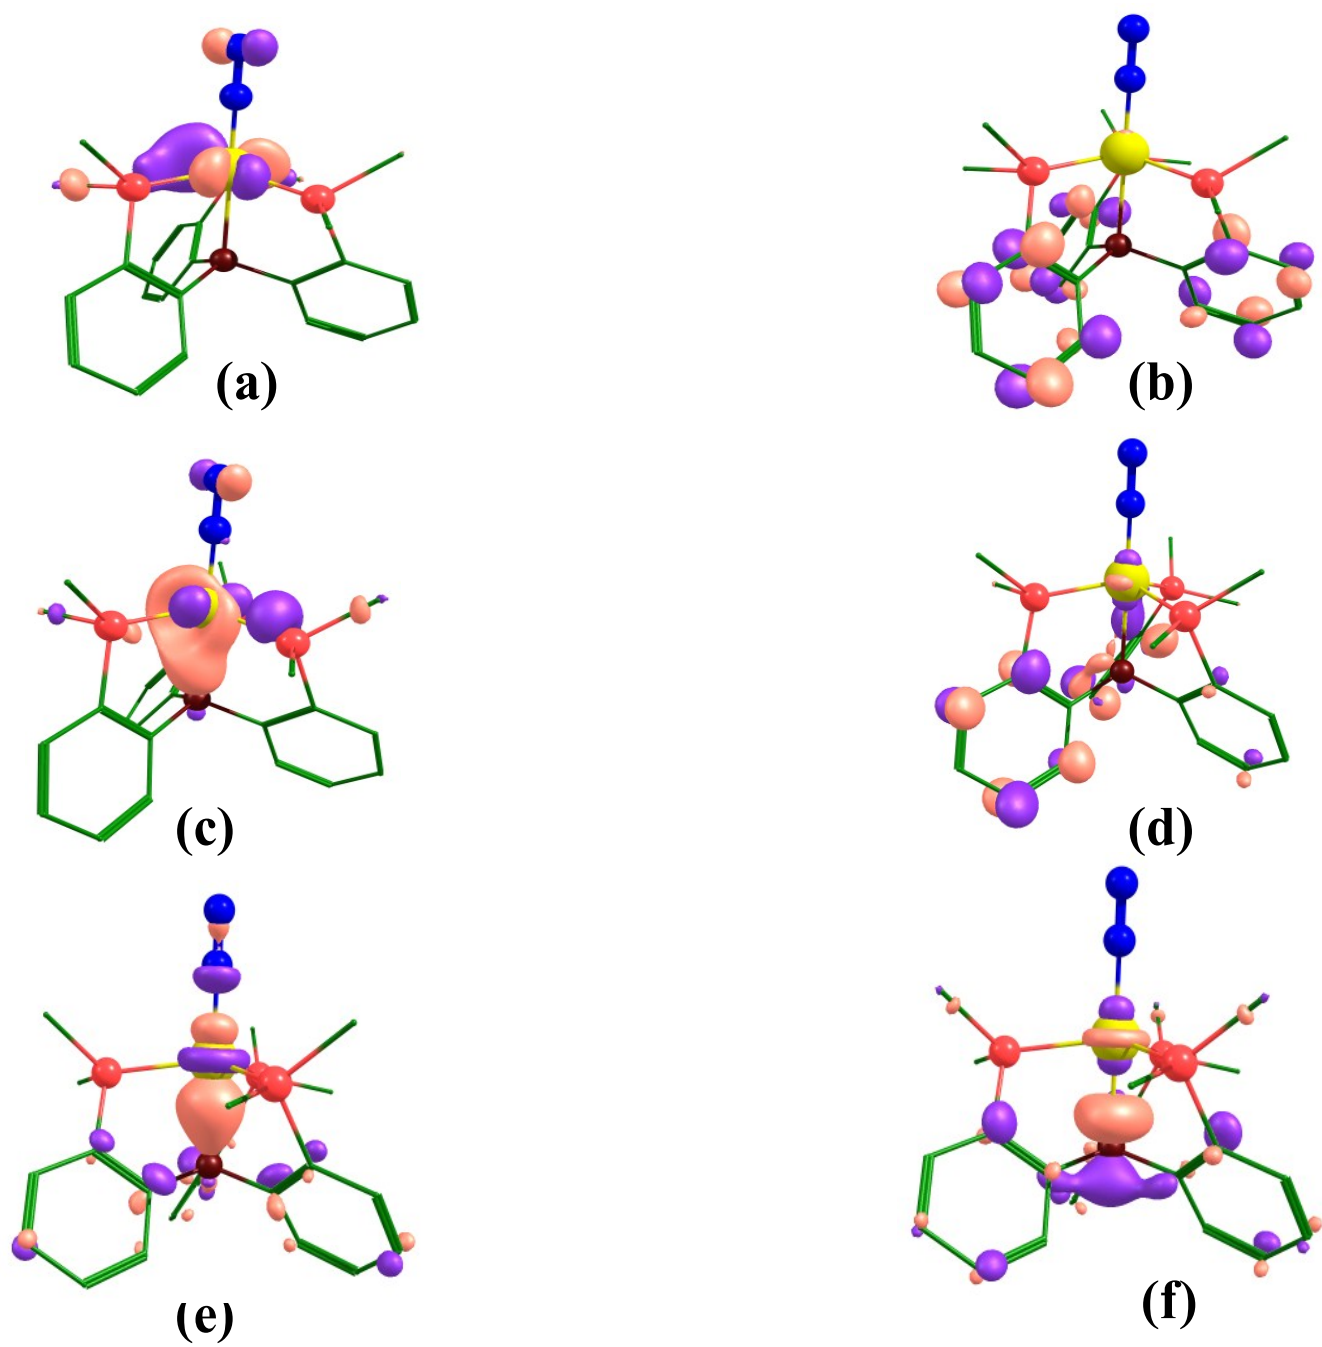

**Figure S3:** HOMO (a),(c) and (e), LUMO (b), (d) and (f) of the  $[(\text{TPB})\text{Fe}]^{2-/1/0}$  respectively.
